# Supplementary material
Source: Royal Society of Chemistry journal article supplement (doi:10.1039/d6ta02289h)
Supplement: d6ta02289h1.pdf [file d6ta02289h1.pdf]

# **Supplementary information for**

## **Enhancing Energy-Storage Characteristics of BNT-Based Ceramic via Quadruple Perovskite ( $AA'_3B_4O_{12}$ ) Modification**

**Amiya Mandal, Deepanshu Kaneria, Shivam Kumar  
Mittal, Munendra Pal, Kanhaiya Lal Yadav\***

**Smart Material Research Laboratory, Department of Physics, Indian  
Institute of Technology Roorkee, Roorkee. India, 247667**

**\*Corresponding author**

**E-mail address: [klyadav35@gmail.com](mailto:klyadav35@gmail.com)**

## Experimental Details

- **Synthesis**

The  $(1-x)\text{Bi}_{0.47}\text{Na}_{0.47}\text{Ba}_{0.06}\text{TiO}_3-x\text{CaCu}_3\text{Ti}_4\text{O}_{12}$  powders, abbreviated as  $(1-x)\text{BNBT}-x\text{CCCTO}$  with  $x = 0, 0.02, 0.04, 0.06$  and  $0.08$ , were prepared using a standard solid-state ceramic route. Commercial oxide and carbonate powders of high purity ( $\text{Bi}_2\text{O}_3 >99.9\%$ ,  $\text{Na}_2\text{CO}_3 >99.8\%$ ,  $\text{TiO}_2 99\%$ ,  $\text{CaCO}_3 99\%$ ,  $\text{CuO} 99\%$  and  $\text{BaCO}_3 99\%$ ; Hi-Media, India) served as the precursors. The weighed chemicals were first mixed in ethanol and ball-milled for 24 h at 300 rpm using zirconia media, which helped to distribute the components evenly. After removing the solvent, the mixed powder was heat-treated at  $850\text{ }^\circ\text{C}$  for 4 h to initiate the reaction.

The calcined material was then milled again to break up soft agglomerates and improve powder flow. A small amount of PVA solution was added so that the powder could be shaped into discs approximately 12 mm in diameter and 1 mm thick under a uniaxial pressure of 350 MPa. The binder was burned out by heating the compacts to  $600\text{ }^\circ\text{C}$  for about 30 min, and final densification took place at  $1150\text{ }^\circ\text{C}$  for 2 h. To minimise the volatilisation of  $\text{Bi}^{3+}$  and  $\text{Na}^+$  during high-temperature sintering, the pellets were sintered in covered alumina crucibles under controlled conditions.

- **Characterization Methods**

Phase formation and crystal structure were examined using a Rigaku SmartLab X-ray diffractometer equipped with  $\text{Cu-K}_\alpha$  radiation ( $\lambda = 1.5406\text{ \AA}$ ). Diffraction patterns were collected over  $20\text{--}80^\circ$  in  $2\theta$  with a step size of  $0.02^\circ$ . Room-temperature Raman spectra were recorded directly from polished pellets using a Nanoscope Raman spectrometer fitted with a 633.40 nm He-Ne laser. Microstructural observations were performed on fracture surfaces using a field-emission scanning electron microscope (FE-SEM; Zeiss Ultra Plus, Carl Zeiss, Germany). In addition, a Talos F200X (S)TEM (Thermo Fisher Scientific) was employed to visualise domain morphology, acquire high-resolution TEM images, and perform SAED analysis. For nanoscale domain mapping, piezoresponse force microscopy (PFM) was conducted on a Bruker Dimension ICON AFM system.

Temperature- and frequency-dependent dielectric measurements were obtained using a HIOKI 3532-50 LCR meter, which also enabled electrochemical impedance spectroscopy (EIS) analysis. Prior to electrical testing, pellets with silver electrodes were dried at  $200\text{ }^\circ\text{C}$  for approximately 45 min to ensure stable contact. For energy-storage measurements, sintered disks were thinned to 0.10–0.20 mm and coated with circular electrodes of 2 mm diameter on both faces. Polarisation–electric field (P–E) loops were collected on a commercial ferroelectric test system (Marine India) operated in silicone oil to prevent dielectric breakdown, and the measurements were carried out under different electric fields, temperatures, frequencies, and cycling conditions. All P–E hysteresis loops were recorded at a

frequency of 50 Hz unless otherwise specified. X-ray photoelectron spectroscopy (XPS) was performed using a PHI 5000 VersaProbe III instrument to analyse cation valence states and oxygen-related defects.

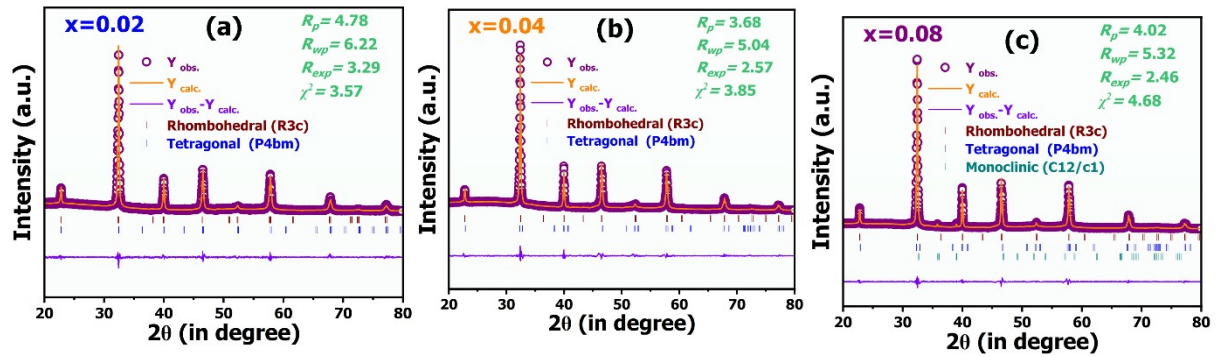

**Fig. S1.** Rietveld refinement of XRD patterns of  $x=0.02$ ,  $0.04$ , and  $0.08$  of  $(1-x)\text{BNBT}-x\text{CCCTO}$ .

**Table S1.** Structural parameters obtained using Rietveld refinement with R3c and P4bm space groups for  $[(1-x)\text{BNBT}-x\text{CCCTO}]$  compositions, where  $x$  varies as  $0.0$ ,  $0.02$ ,  $0.04$ ,  $0.06$ , and  $0.08$

[ **Symbols:** Rhombohedral with Space Groups **R3c (R)**, and tetragonal with Space Group **P4bm (T)**]

| <i>SBT</i><br>Contents<br>( <i>x</i> ) | <i>Phase (%)</i> |       | <i>Lattice constants and cell volume</i> |         |          |         | $R_p$ | $R_{wp}$ | $R_{exp}$ | $\chi^2$ |
|----------------------------------------|------------------|-------|------------------------------------------|---------|----------|---------|-------|----------|-----------|----------|
|                                        | Name             | %     | a                                        | b       | c        | V       |       |          |           |          |
| 0.00                                   | R3c              | 62.08 | 5.52129                                  | 5.52129 | 13.48526 | 356.017 | 4.67  | 5.87     | 3.15      | 3.47     |
|                                        | P4bm             | 37.92 | 5.52506                                  | 5.52506 | 3.90434  | 119.185 |       |          |           |          |
| 0.02                                   | R3c              | 31.99 | 5.52913                                  | 5.52913 | 13.56291 | 359.084 | 4.78  | 6.22     | 3.29      | 3.57     |
|                                        | P4bm             | 68.01 | 5.52207                                  | 5.52207 | 3.89997  | 118.923 |       |          |           |          |
| 0.04                                   | R3c              | 15.65 | 5.54102                                  | 5.54102 | 13.30814 | 353.856 | 3.68  | 5.04     | 2.57      | 3.85     |
|                                        | P4bm             | 84.35 | 5.52388                                  | 5.52388 | 3.90565  | 119.174 |       |          |           |          |
| 0.06                                   | R3c              | 6.04  | 5.54078                                  | 5.54078 | 13.25752 | 352.480 | 3.93  | 5.23     | 2.62      | 3.99     |
|                                        | P4bm             | 91.62 | 5.52203                                  | 5.52203 | 3.90188  | 118.979 |       |          |           |          |
|                                        | C 1 2/c 1        | 2.34  | 4.68897                                  | 3.39154 | 5.10593  | 80.075  |       |          |           |          |
| 0.08                                   | R3c              | 3.39  | 5.54166                                  | 5.54166 | 13.25369 | 352.490 | 4.02  | 5.32     | 2.46      | 4.68     |
|                                        | P4bm             | 92.81 | 5.52173                                  | 5.52173 | 3.90391  | 119.028 |       |          |           |          |
|                                        | C 1 2/c 1        | 3.80  | 4.68492                                  | 3.40566 | 5.05141  | 79.511  |       |          |           |          |

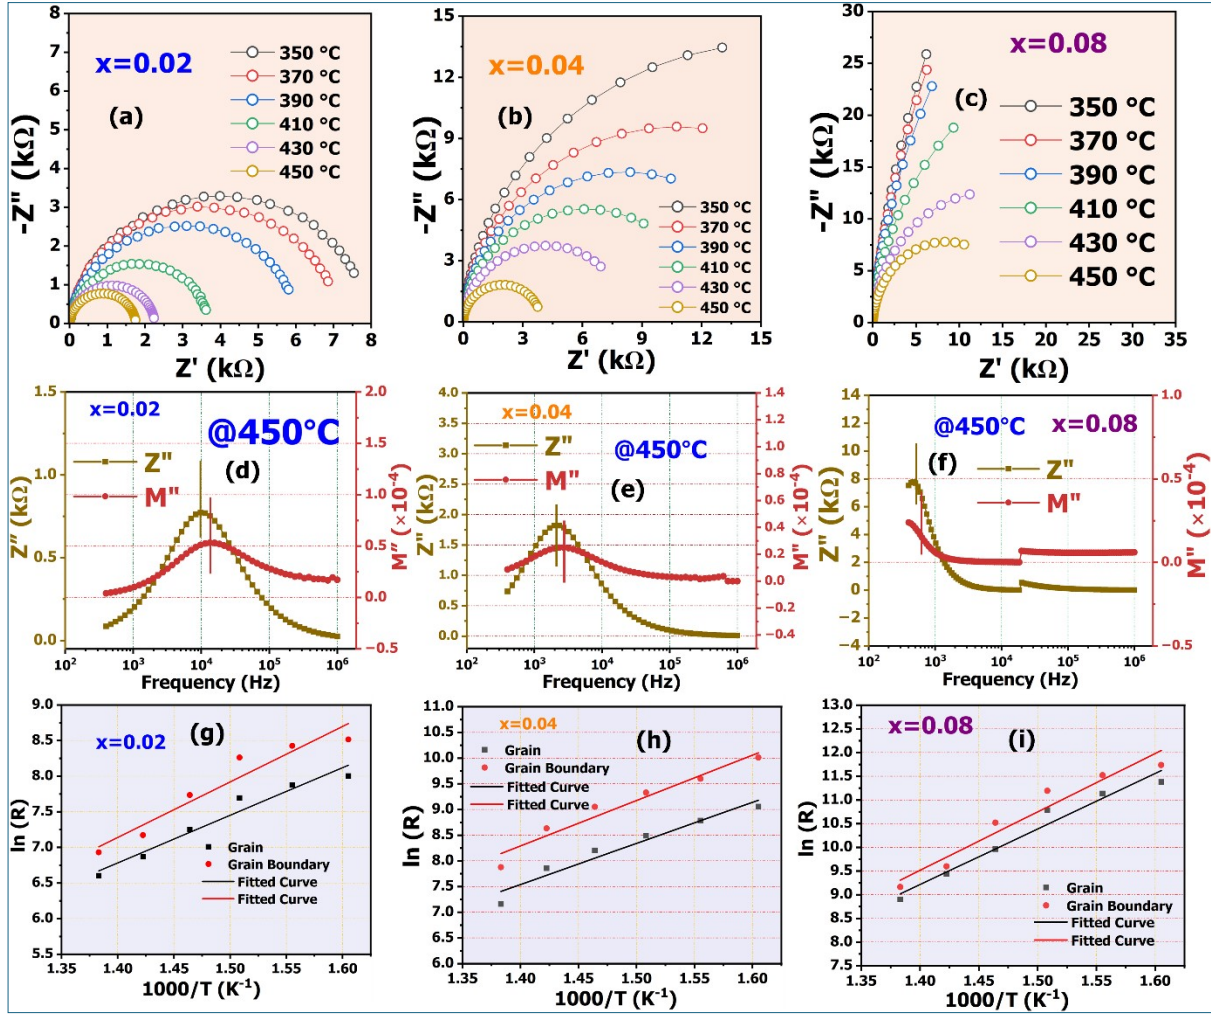

**Fig. S3.** Electrochemical impedance spectroscopy (EIS) analysis of  $(1-x)\text{BNBT}-x\text{CCTO}$  ceramics with  $x = 0.02, 0.04,$  and  $0.08$ . (a–c) Nyquist plots recorded at different temperatures (350–450 °C); (d–f) frequency dependence of imaginary impedance ( $Z''$ ) and electric modulus ( $M''$ ) measured at 450 °C; (g–i) Arrhenius plots of grain and grain-boundary resistances extracted from equivalent-circuit fitting.

**Table S2.** Equivalent circuit fitting parameters  $R_g$  and  $R_{gb}$  ( $\Omega$ ) for the (1-x)BNBT-xCCTO ceramics.

| $x \downarrow$ | Temp. $\rightarrow$ | 350°C  | 370°C  | 390°C | 410°C | 430°C | 450°C |
|----------------|---------------------|--------|--------|-------|-------|-------|-------|
| 0.00           | $R_g$               | 1911   | 1537   | 1312  | 1053  | 883   | 527   |
|                | $R_{gb}$            | 3637   | 3169   | 2478  | 1669  | 1291  | 899   |
| 0.02           | $R_g$               | 2989   | 2636   | 2194  | 1410  | 963   | 737   |
|                | $R_{gb}$            | 4987   | 4569   | 3869  | 2286  | 1302  | 1023  |
| 0.04           | $R_g$               | 8562   | 6527   | 4863  | 3654  | 2584  | 1287  |
|                | $R_{gb}$            | 22256  | 14732  | 11256 | 8532  | 5621  | 2635  |
| 0.06           | $R_g$               | 30925  | 23532  | 17221 | 10522 | 5134  | 3086  |
|                | $R_{gb}$            | 85287  | 64852  | 46624 | 27321 | 12521 | 8022  |
| 0.08           | $R_g$               | 87654  | 68569  | 48425 | 21207 | 12563 | 7342  |
|                | $R_{gb}$            | 125164 | 100961 | 72686 | 37053 | 14765 | 9534  |

**Table S3.** The calculated tolerance factor ( $t$ ) values of (1-x)BNBT-xCCTO ( $R_{Na^+} = 1.39 \text{ \AA}$ , CN=12;  $R_{Bi^{3+}} = 1.36 \text{ \AA}$ , CN=12;  $R_{Ba^{2+}} = 1.61 \text{ \AA}$ , CN=12;  $R_{Ca^{2+}} = 1.34 \text{ \AA}$ , CN=12;  $R_{Cu^{2+}} = 0.57 \text{ \AA}$ , CN=4;  $R_{Ti^{4+}} = 0.605 \text{ \AA}$ , CN=6;  $R_{O^{2-}} = 1.40 \text{ \AA}$ , CN=6) <sup>1,2</sup>.

| SBT Contents (x) | Tolerance Factor (t) |
|------------------|----------------------|
| 0.00             | 0.98364              |
| 0.02             | 0.97922              |
| 0.04             | 0.9748               |
| 0.06             | 0.97038              |
| 0.08             | 0.96596              |

For  $ABO_3$  perovskite ceramics, “tolerance factors” ( $t$ ) are often used to predict the stability of the perovskite structure:

$$t = \frac{R_A + R_O}{\sqrt{2}(R_B + R_O)}$$

Where  $R_A$ ,  $R_B$ , and  $R_O$  are the average ionic radii of A cation, B cation, and oxygen anion, respectively <sup>3</sup>.

**Table S4.** A comparison of  $x=0.06$  ceramic with recently reported lead-free energy storage ceramics in terms of  $W_{rec}$ ,  $E_b$ ,  $\eta$ , and  $W_{rec}/E_b$ .

| Sl. No. | Material type | Composition (testing frequency/electric field waveform)                                                     | $W_{rec}$ ( $J\ cm^{-3}$ ) | $E_b$ ( $kV\ cm^{-1}$ ) | $\eta$ (%) | $W_{rec}/E_b$ ( $mC\ cm^{-2}$ ) | Sample Thickness ( $\mu m$ ) | Ref. (year) |
|---------|---------------|-------------------------------------------------------------------------------------------------------------|----------------------------|-------------------------|------------|---------------------------------|------------------------------|-------------|
|         | BT-based      | 0.9(0.7BT-0.3B <sub>0.5</sub> SG <sub>0.3</sub> F)-0.1BMZ (NA)                                              | 4.72                       | 350                     | 85         | 0.01349                         | 100                          | 4 (2026)    |
|         |               | 0.96BST-0.04BLT (NA)                                                                                        | 3.2                        | 400                     | 79         | 0.00800                         | NA                           | 5 (2026)    |
|         |               | 0.92(0.7BT-0.3NBT)-0.08SAN (NA)                                                                             | 7.5                        | 670                     | 92.4       | 0.01119                         | NA                           | 6 (2026)    |
|         |               | 0.88BTH-0.12BZT (NA)                                                                                        | 4.4                        | 500                     | 94         | 0.00880                         | 100-80                       | 7 (2025)    |
|         |               | BT-BMT-0.16Ca (NA)                                                                                          | 6.74                       | 610                     | 83.05      | 0.01105                         | 60                           | 8 (2025)    |
|         | NN-based      | 0.90NN-0.10BLYDTMH (10 Hz / NA)                                                                             | 6.1                        | 610                     | 52.7       | 0.01000                         | 50-70                        | 9 (2026)    |
|         |               | 0.91NN-0.09CS- (W, Mn) (NA)                                                                                 | 5.36                       | 700                     | 75.25      | 0.00766                         | 60                           | 10 (2025)   |
|         |               | 0.9NN-0.1BNTZ (NA)                                                                                          | 3.53                       | 242.2                   | 74.2       | 0.01457                         | 200 to 30                    | 11 (2025)   |
|         |               | 0.85[0.9NN-0.1LBMT]-0.15CT (NA)                                                                             | 4.02                       | 470                     | 87         | 0.00855                         | 100                          | 12 (2025)   |
|         |               | (Na <sub>0.94</sub> La <sub>0.06</sub> )(Nb <sub>0.88</sub> Zr <sub>0.12</sub> )O <sub>3</sub> (10 Hz / NA) | 5.00                       | 710                     | 81.17      | 0.00704                         | 50                           | 13 (2025)   |
|         | BKT-based     | BKT-BST-CT (NA)                                                                                             | 5.78                       | 380                     | 87.9       | 0.01521                         | NA                           | 14 (2024)   |
|         |               | BKT-0.5CT (NA)                                                                                              | 6.03                       | 500                     | 91.2       | 0.01206                         | 70-50                        | 15 (2024)   |
|         |               | 0.96(0.6BKT-0.4SBT)-0.04BMF (NA)                                                                            | 4.25                       | 360                     | 87         | 0.01181                         | 100                          | 16 (2023)   |
|         |               | BKST50 (1 Hz / Triangular)                                                                                  | 2.25                       | 240                     | 73.7       | 0.00937                         | 200                          | 17 (2023)   |
|         | BNT-based     | BNBT-SBT-0.07NN (NA)                                                                                        | 7.46                       | 697                     | 82.3       | 0.01070                         | 50                           | 18 (2026)   |
|         |               | BNT-SST-0.3NBNM (NA)                                                                                        | 5.5                        | 420                     | 79         | 0.01309                         | NA                           | 19 (2026)   |
|         |               | NBBCT-0.05SNA (1 Hz / NA)                                                                                   | 2.37                       | 160                     | 88.24      | 0.01481                         | NA                           | 20 (2026)   |
|         |               | 0.8[0.94(BNYT-0.06BMT)]-0.2BSTH (NA)                                                                        | 6.14                       | 410                     | 91.32      | 0.01497                         | NA                           | 21 (2025)   |
|         |               | 0.85BNT-0.15CTA (NA)                                                                                        | 5.89                       | 370                     | 87.4       | 0.01592                         | NA                           | 22 (2025)   |
|         |               | 0.40BNT-0.60BZT (100 Hz / NA)                                                                               | 4.1                        | 240                     | 91         | 0.01708                         | 130-100                      | 23 (2025)   |
|         |               | BF-BKT-0.4CT                                                                                                | 6.24                       | 685                     | 81.4       | 0.00911                         | 50-40                        | 24          |

|  |                                  |                                                                                                                     |                                |      |       |         |            |                         |
|--|----------------------------------|---------------------------------------------------------------------------------------------------------------------|--------------------------------|------|-------|---------|------------|-------------------------|
|  |                                  | (NA)                                                                                                                |                                |      |       |         |            | (2025)                  |
|  | <b>BF-based</b>                  | (0.67BFO-0.33BTO)-<br>SN-0.03 (10 Hz / NA)                                                                          | 6.12                           | 355  | 80    | 0.01724 | NA         | <sup>25</sup><br>(2025) |
|  |                                  | 0.8BFBT-0.2NTN<br>(10 Hz / NA)                                                                                      | 6.44                           | 440  | 87    | 0.01464 | 100        | <sup>26</sup><br>(2025) |
|  |                                  | 0.67BFO-0.33BTO-<br>0.09SNMAZZ<br>(NA)                                                                              | 5.31                           | 315  | 76.9  | 0.01686 | 80-50      | <sup>27</sup><br>(2025) |
|  |                                  | BFST-0.05NN (10 Hz /<br>NA)                                                                                         | 4.98                           | 340  | 67    | 0.01465 | NA         | <sup>28</sup><br>(2025) |
|  |                                  | <b>KNN-based</b>                                                                                                    | 0.85KNN-BCZT-<br>0.15NBST (NA) | 7.48 | 500   | 75.06   | 0.01496    | 200-100                 |
|  | KNLN-0.15SZ<br>(NA)              |                                                                                                                     | 4.06                           | 400  | 75    | 0.01015 | 100        | <sup>30</sup><br>(2025) |
|  | KNN-0.08BCMS<br>(NA)             |                                                                                                                     | 5.8                            | 360  | 83.5  | 0.01611 | 100        | <sup>31</sup><br>(2025) |
|  | 0.94KLNN-0.06CMT<br>(10 Hz / NA) |                                                                                                                     | 6.4                            | 370  | 73.6  | 0.01730 | 100        | <sup>32</sup><br>(2025) |
|  | KNN-0.15<br>(NA)                 |                                                                                                                     | 6.36                           | 580  | 84    | 0.01096 | 60-50      | <sup>33</sup><br>(2025) |
|  | <b>SBT-based</b>                 | SBT-0.15BNiT<br>(NA)                                                                                                | 5.12                           | 460  | 97.13 | 0.01113 | 70-50      | <sup>34</sup><br>(2026) |
|  |                                  | 0.62SBT-0.38KBT-<br>1%LNS (10 Hz / NA)                                                                              | 4.07                           | 230  | 79.75 | 0.01769 | 200        | <sup>35</sup><br>(2025) |
|  |                                  | Sr <sub>0.7</sub> Bi <sub>0.15</sub> Ho <sub>0.05</sub> TiO <sub>3</sub><br>(NA)                                    | 2.16                           | 300  | 95.8  | 0.00720 | NA         | <sup>36</sup><br>(2024) |
|  |                                  | Sr <sub>0.6</sub> (Li <sub>0.5</sub> La <sub>0.5</sub> ) <sub>0.1</sub> Bi <sub>0.2</sub> Ti<br>O <sub>3</sub> (NA) | 4.4                            | 420  | 90    | 0.01048 | NA         | <sup>37</sup><br>(2024) |
|  |                                  | SBT-0.15BCT<br>(NA)                                                                                                 | 2.31                           | 238  | 82    | 0.00970 | 150-100    | <sup>38</sup><br>(2024) |
|  | <b>AN-based</b>                  | ABCN1<br>(1 Hz / NA)                                                                                                | 4.4                            | 205  | 63    | 0.02146 | 210-170    | <sup>39</sup><br>(2025) |
|  |                                  | Ag <sub>0.94</sub> Yb <sub>0.02</sub> NbO <sub>3</sub><br>(10 Hz / NA)                                              | 4.05                           | 270  | 61    | 0.01500 | NA         | <sup>40</sup><br>(2025) |
|  |                                  | ALS5N<br>(10 Hz / NA)                                                                                               | 4.32                           | 315  | 51.39 | 0.01371 | 100        | <sup>41</sup><br>(2025) |
|  |                                  | ASNN0.05<br>(NA)                                                                                                    | 3.9                            | 300  | 83    | 0.01300 | 200-100    | <sup>42</sup><br>(2025) |
|  |                                  | AMN-1.5Sm<br>(10 Hz / NA)                                                                                           | 5.18                           | 320  | 73.3  | 0.01619 | 100        | <sup>43</sup><br>(2025) |
|  | <b>This work</b>                 | 0.94BNBT-0.06CCTO<br>(50 Hz / Triangular)                                                                           | 4.69                           | 202  | 90.47 | 0.02322 | 200 to 100 | <b>This Work</b>        |

[NA: Data not reported in original publication]

[“NA: Thickness not available in reference; comparison made based on reported electric field strength and  $W_{rec}$ .”]

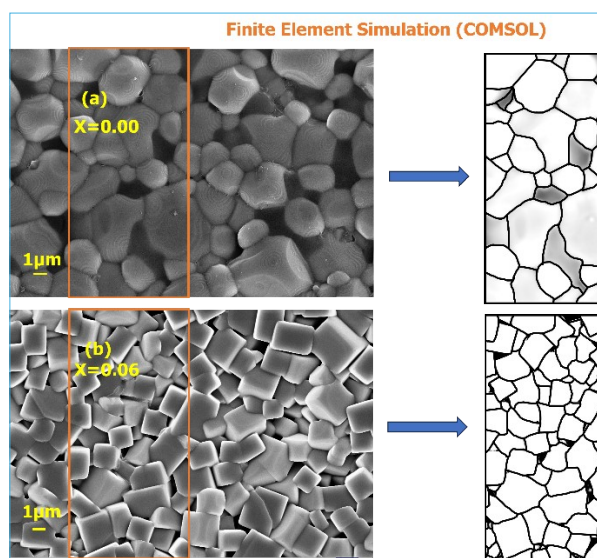

**Figure S4.** FESEM-derived microstructural input used for finite-element simulations. Representative cropped regions from the main FESEM images of (a)  $x = 0.00$  and (b)  $x = 0.06$  ceramics, showing the extracted grain boundaries employed to construct the two-dimensional COMSOL simulation domains.

### References:

- 1 R. D. Shannon, *Acta Cryst.*, 1976, **A32**, 751–767.
- 2 H. Qi, R. Zuo, J. feng Li and L. Li, *J. Eur. Ceram. Soc.*, 2018, **38**, 5341–5347.
- 3 Y. Ning, Y. Pu, X. Zhang, Z. Chen, C. Wu, L. Zhang, B. Wang and X. Li, *Mater. Today Phys.*, 2024, **43**, 101418.
- 4 S. Zhang, L. Yang, X. Miao, R. Jing, Z. Deng, J. Luo, Y. Zhang, A. Zhang and M. Zeng, *J. Eur. Ceram. Soc.*, 2026, **46**, 117916.
- 5 B. Zhang, Y. Gu, K. Ma, D. Wang, X. Zhang and X. Qi, *J. Energy Storage*, 2026, **141**, 119222.
- 6 D. Ballo, S. Wang, J. Qian, G. Ge, Y. Liu, Z. Mu and J. Zhai, *Ceram. Int.*, 2026, **52**, 8706-8716.
- 7 T. Li, J. Yin and J. He, *Ceram. Int.*, 2025, **51**, 57800–57806.
- 8 H. Qi, S. Yan, B. He, M. Xie and G. Wang, *J. Mater. Sci. Mater. Electron.*, 2025, **36**, 1471.
- 9 S. Zou, W. Fan, L. Tong, Y. Gu, X. Zhang and X. Qi, *J. Mater. Chem. A*, 2026, **14**, 2497–2506.
- 10 B. Liu, M. Wang, X. Wang, L. Chen, Q. Zhao, Q. Mi, M. Chu, T. Wang, J. Ding and Y. Li, *Ceram. Int.*, 2025, **51**, 57238–57248.
- 11 X. Zhong, A. Shui, H. Yu and Y. Fang, *J. Alloys Compd.*, 2025, **1010**, 177559.
- 12 H. Wen, X. Wu, N. Zhou, H. Li and J. Cao, *J. Mater. Sci. Mater. Electron.*, 2025, **36**, 1–15.
- 13 X. Zhai, M. Lu, J. Du, J. Hao, W. Kuai, Z. Gai, M. Zhao and L. Zheng, *J. Eur. Ceram. Soc.*, 2025,

- 45, 117151.
- 14 P. Zheng, L. Sheng, W. Wang, Y. Ying, K. Zhang and J. Wang, *ACS Appl. Electron. Mater.*, 2024, **6**, 6932–6939.
  - 15 X. Li, J. Xi, C. Li, W. Bai, S. Wu, P. Zheng, P. Li and J. Zhai, *J. Mater. Chem. A*, 2024, **12**, 32359–32370.
  - 16 R. Kang, Z. Wang, Y. Zhao, Y. Li, Y. Hu, X. Hao, L. Zhang and X. Lou, *J. Alloys Compd.*, 2023, **935**, 167999.
  - 17 M. Kitamura, S. Fujihara and M. Hagiwara, *J. Eur. Ceram. Soc.*, 2023, **43**, 6069–6076.
  - 18 X. Lei, F. Zhang, M. Li, J. Liu, X. Ma, C. Wang, X. Gao and Z. J. Wang, *J. Energy Storage*, 2026, **141**, 119557.
  - 19 H. Lian, S. Lv, W. Gao, M. Shi and X. Chen, *J. Mater. Sci. Mater. Electron.*, 2026, **37**, 118.
  - 20 Z. Li, X. Zhao, J. Zhang and J. Zhang, *Mater. Sci. Eng. B*, 2026, **323**, 118712.
  - 21 X. Zeng, Y. Zhang, J. Shen, X. Jiang, S. Wang, H. Dai, X. Wu, M. Gao, C. Zhao, T. Lin, L. Luo, J. Lin, B. Sa and C. Lin, *Small*, 2025, **21**, 2406080.
  - 22 J. Fan, L. Wang, J. Wang, Z. Cheng, L. Zhong, T. Yang and Z. Hu, *Inorg. Chem. Front.*, 2025, **12**, 1444–1454.
  - 23 W. Zhou, Y. Zhang, Y. Zhang, X. Yang, X. Zhang, Q. Zhang, S. Jiang, G. Zhang, Y. Chen and M. Shen, *J. Am. Ceram. Soc.*, 2025, **108**, e20382.
  - 24 W. Zhang, S. Chen, J. Lv, J. Hu, T. Wang, H. Luo, J. Liu, W. Gong and Z. Pan, *Ceram. Int.*, 2025, **51**, 51299–51306.
  - 25 J. Zhang, Y. Pu, Y. Hao, Q. Pan, Y. Han, Y. Yang, L. Zhang and B. Wang, *Chem. Eng. J.*, 2025, **516**, 164008.
  - 26 C. Peng, A. Shui, H. Yu and X. Zhong, *Ceram. Int.*, 2025, **51**, 52741–52750.
  - 27 Y. Pu, J. Zhang, Y. Hao, Y. Yang, P. Lv, L. Zhang, B. Wang and Y. Wang, *J. Alloys Compd.*, 2025, **1040**, 183487.
  - 28 J. Zhang, Y. Pu, Y. Hao, B. Wang, Y. Han, Y. Yang and L. Zhang, *J. Eur. Ceram. Soc.*, 2026, **46**, 117920.
  - 29 L. Diwu and Z. Sun, *Ceram. Int.*, 2025, **51**, 51672–51678.
  - 30 Y. Yang, Z. Liu, L. Gao, Z. Wang, K. Guo, P. Mao, B. Xie, Y. Tian, F. Xue and L. Shu, *ACS Appl. Mater. Interfaces*, 2025, **17**, 22963–22973.
  - 31 L. Zhang, X. Zhu, J. Yin, W. Li, X. Tang, R. Zhao, K. Chen, Z. Jian, Y. Zhao, Y. Liu, Y. Jiang, X. Guo and K. Yan, *Ceram. Int.*, 2025, **51**, 65264–65272.
  - 32 X. Zhang, S. Dang, Y. Wang, Q. Chai, Z. Peng, D. Wu, P. Liang, L. Wei, X. Chao and Z. Yang, *Small*, 2025, **21**, e08980.
  - 33 Y. Tao, H. Yang, M. Wang, B. Zheng and Y. Lin, *J. Alloys Compd.*, 2025, **1024**, 180210.
  - 34 Y. Mao, J. Zhang, M. Chen, M. Fang, N. Yan, Z. Lou and Y. Zhou, *Scr. Mater.*, 2026, **273**, 117101.
  - 35 H. Zheng, Y. Gu, K. Ma, X. Zhang and X. Qi, *J. Energy Storage*, 2025, **112**, 115550.
  - 36 J. Chen, P. Zhao, F. Si, Y. Li, S. Zhang, Z. Fang and B. Tang, *Ceram. Int.*, 2024, **50**, 13208–13218.

- 37 J. Chen, P. Zhao, K. Chen, F. Si, Z. Fang, S. Zhang and B. Tang, *Chem. Eng. J.*, 2024, **502**, 157866.
- 38 R. Chen, Y. Wang, W. Zhao, Y. Chen, L. Zhao and B. Cui, *J. Mater. Sci. Mater. Electron.*, 2024, **35**, 916.
- 39 Z. Yan, J. He, H. Chen, D. Zhang, Y. Liu, H. Luo, C. Li, I. Abrahams and H. Yan, *Small*, 2025, **21**, 2500810.
- 40 Z. Lin, W. He, Y. Liu, C. Luo, A. You, W. Chao, J. Chen, J. Li, M. Chen and X. Wang, *ACS Appl. Eng. Mater.*, 2025, **3**, 3127–3135.
- 41 M. Chu, P. An, H. Yang, C. Cai and Q. Mi, *J. Mater. Sci. Mater. Electron.*, 2025, **36**, 1085.
- 42 Y. Tian, S. Guo, Y. Jia, T. Xia, Y. Xu, L. She, Z. Sun, Y. Wu, W. Ge, L. Jin and X. Wei, *J. Eur. Ceram. Soc.*, 2025, **45**, 117481.
- 43 B. Yang, W. Xu, Y. Zhang, Z. Xu, S. Wu, X. Wu, C. Zhao, T. Lin, M. Gao and C. Lin, *J. Eur. Ceram. Soc.*, 2025, **45**, 117218.
